# Supplementary material
Source: PubMed Central journal article supplement (PMC8592534)
Supplement: jci-131-146643-s008.pdf [file jci-131-146643-s008.pdf]

## Supplementary Material for

# Recipient APOL1 risk alleles associate with death-censored renal allograft survival and rejection episodes

### Supplementary Figures

|                                                                                                                                 |     |
|---------------------------------------------------------------------------------------------------------------------------------|-----|
| Figure S1. Flowchart of genotyping and quality control for CTOT cohort                                                          | 1   |
| Figure S2. Genetic ancestry of CTOT donors and recipients                                                                       | 2-3 |
| Figure S3. Kaplan-Meier plot of death-censored allograft survival for recipients with different numbers of APOL1 risk alleles   | 4   |
| Figure S4. Recipient pAFR and creatinine in GOCAR and CTOT cohorts                                                              | 5   |
| Figure S5. Allele specific expression of APOL1 in single cell RNA sequencing data from pre-transplant PBMCs of GOCAR recipients | 6   |
| Figure S6. Enrichment in immune related pathways of DEGs in scRNAseq data from PBMCs of two AA/H ESRD patients                  | 7   |

### Supplementary Tables

|                                                                                                                                                             |     |
|-------------------------------------------------------------------------------------------------------------------------------------------------------------|-----|
| Table S1. Demographic and clinicopathologic characteristics of GOCAR and CTOT donors and recipients with genome-wide genotype data                          | 8-9 |
| Table S2. Genetic ancestry and self-reported ancestry of donors and recipients in CTOT                                                                      | 10  |
| Table S3. APOL1 risk genotype in donor-recipient pairs of GOCAR and CTOT                                                                                    | 11  |
| Table S4. Summary of APOL1 risk alleles in GOCAR and CTOT cohorts stratified by recipients and donors with different genetic ancestries                     | 12  |
| Table S5. Association of recipient APOL1 risk alleles with DCAL under different genetic models in multivariable Cox regression analysis of the GOCAR cohort | 13  |
| Table S6. Association of APOL1 risk alleles with death-censored allograft loss in an additive manner in CTOT cohort                                         | 14  |
| Table S7. Association of recipient APOL1 risk alleles with DCAL within the stratum of donors carrying APOL1 low-risk genotype in the GOCAR cohort.          | 15  |
| Table S8. Association of recipient APOL1 risk alleles with DCAL within the stratum of donors carrying APOL1 low-risk genotype in the CTOT cohort.           | 16  |
| Table S9. Association of APOL1 risk alleles with different TCMR outcomes in an additive way in CTOT data                                                    | 17  |
| Table S10. Association of APOL1 risk alleles with death-censored allograft loss independent of APOL1 SNP-wise mismatch in GOCAR and CTOT                    | 18  |
| Table S11. Enrichment in KEGG pathways of DEGs identified in immune cells in DICE data                                                                      | 19  |
| Table S12. GOCAR recipients with generated single cell RNA-seq data                                                                                         | 19  |
| Table S13. Enrichment in KEGG pathways of DEGs identified from four GOCAR recipients with single cell RNA sequencing data of pre-transplant PBMCs           | 19  |
| Table S14. Enrichment in immune related pathways of DEGs identified from a subset of GOCAR recipients with PBMC bulk RNA sequencing data                    | 19  |
| Table S15. Genes used to define cell types in the scRNAseq data analysis                                                                                    | 19  |

### References

20

## Supplementary Figures

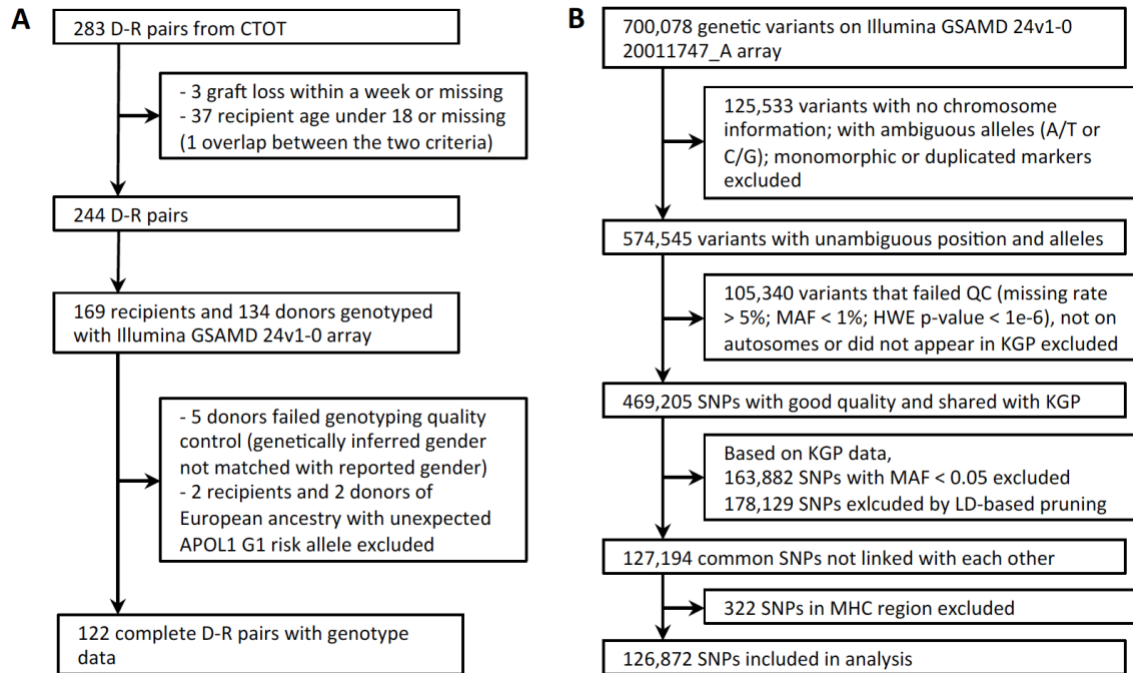

**Figure S1. Flowchart of genotyping and quality control for CTOT cohort. (A)** Participants; **(B)** Genetic variants. The CTOT data after QC are part of what is shown in Figure 1 in the main text. QC: quality control; MAF: minor allele frequency; HWE: Hardy-Weinberg equilibrium; KGP: 1000 Genomes Project; LD: linkage disequilibrium; MHC: major histocompatibility complex.

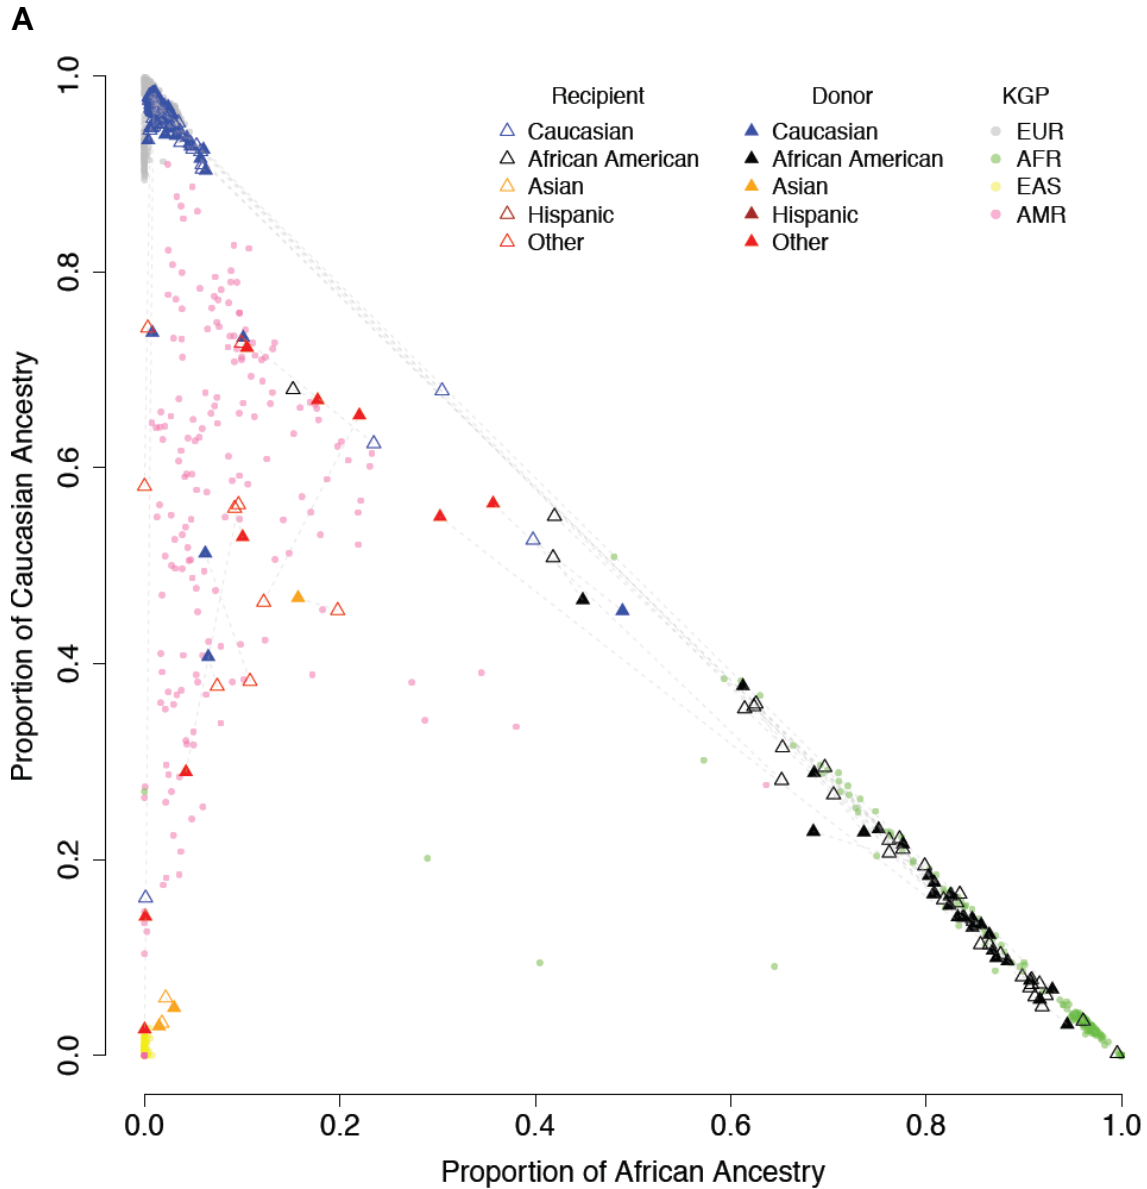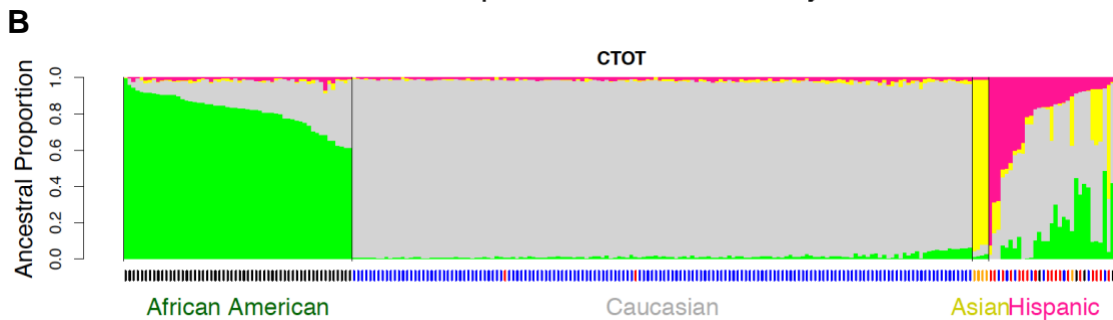

**Figure S2. Genetic ancestry of CTOT donors and recipients. (A)** Samples from 1000 Genomes Project (KGP) with different ethnicities anchor the location of continental-level ancestries on the space spanned by estimated proportions of African and Caucasian ancestries. CTOT donors (solid triangle) and recipients (empty triangle) are projected onto the same space and colored based on self-reported ancestry. Donor-recipient pairs

are connected by dashed lines. KGP: 1000 Genomes Project; EUR: European; AFR: African; EAS: East Asian; AMR: American. **(B)** The ancestral composition of each individual in CTOT. Each vertical bar represents an individual. The length of colored segments within each bar indicates the estimated proportion of different genetic ancestries. The ticks under the bar plot indicates self-reported race with the same color code in legend of (A).

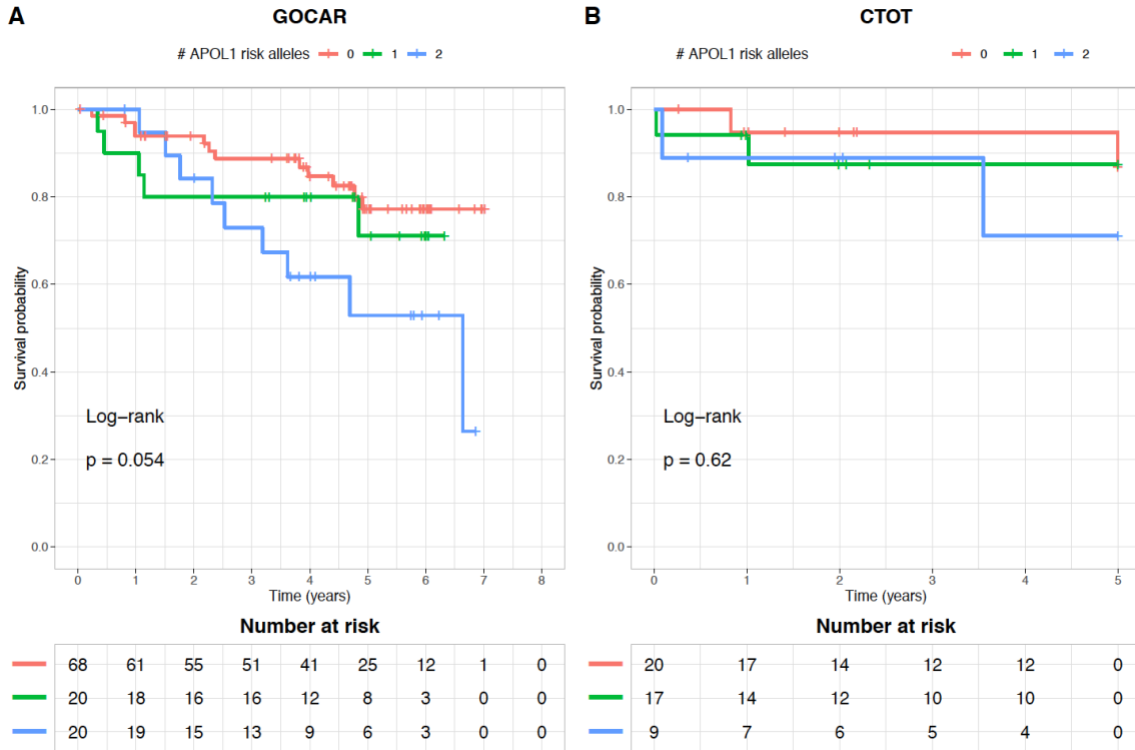

**Figure S3. Kaplan-Meier plot of death-censored allograft survival for recipients with different numbers of APOL1 risk alleles.** The subset of African American and Hispanic recipients was shown. (A) GOCAR; (B) CTOT.

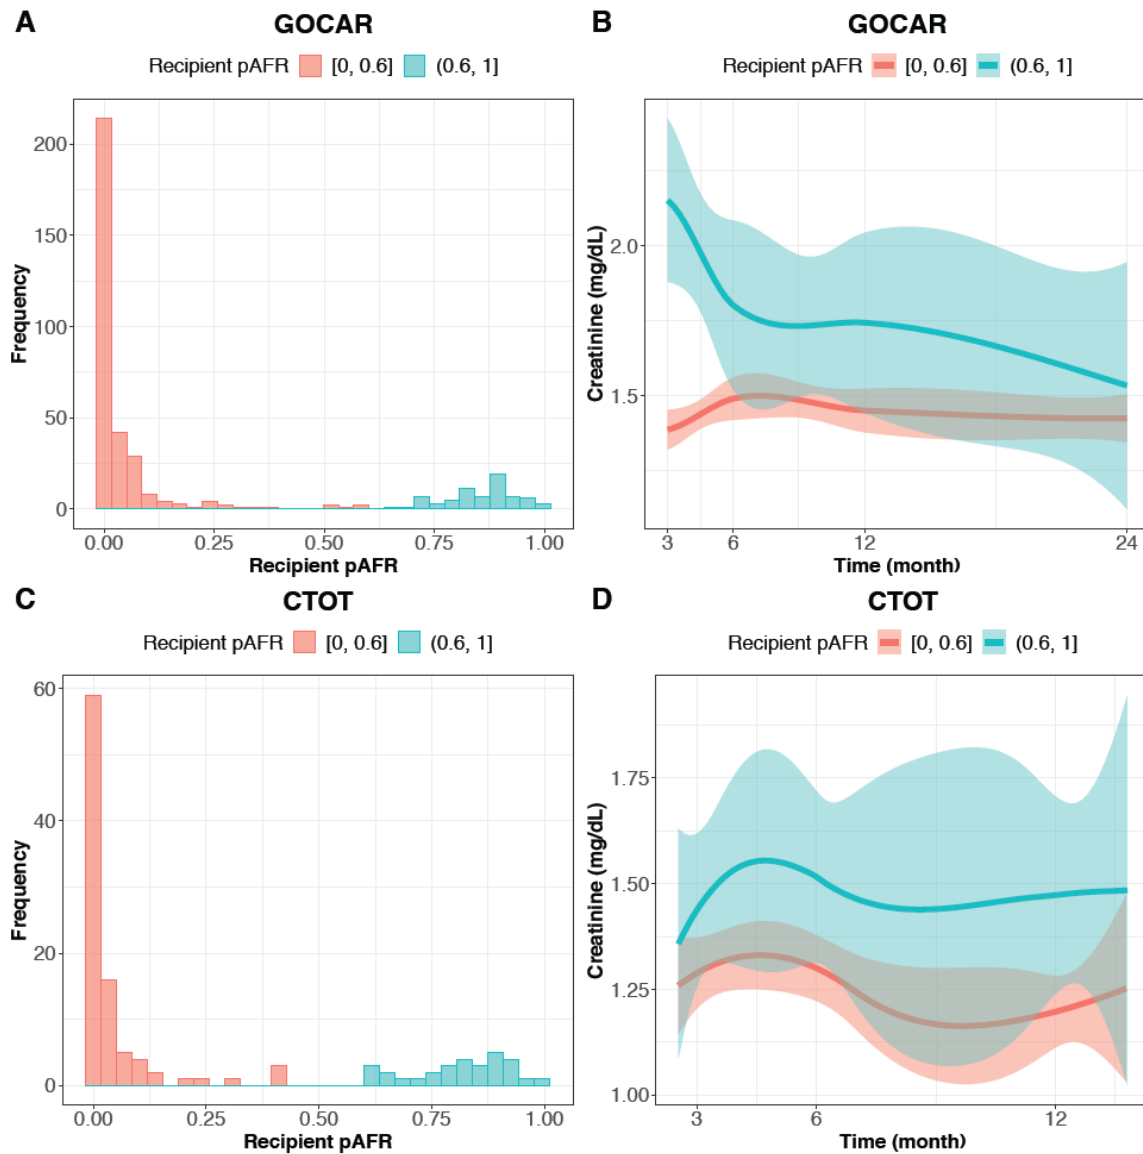

**Figure S4. Recipient pAFR and creatinine in GOCAR and CTOT cohorts.** (A) and (C) Histogram of the distribution of recipient pAFR values in GOCAR and CTOT cohorts. Recipients were categorized in 2 groups by their pAFR corresponding to non-African American and African American. (B) and (D) Smoothed curves with 95% confidence band for longitudinal creatinine levels grouped by recipient pAFR as shown in (A) and (C) for GOCAR and CTOT cohorts.

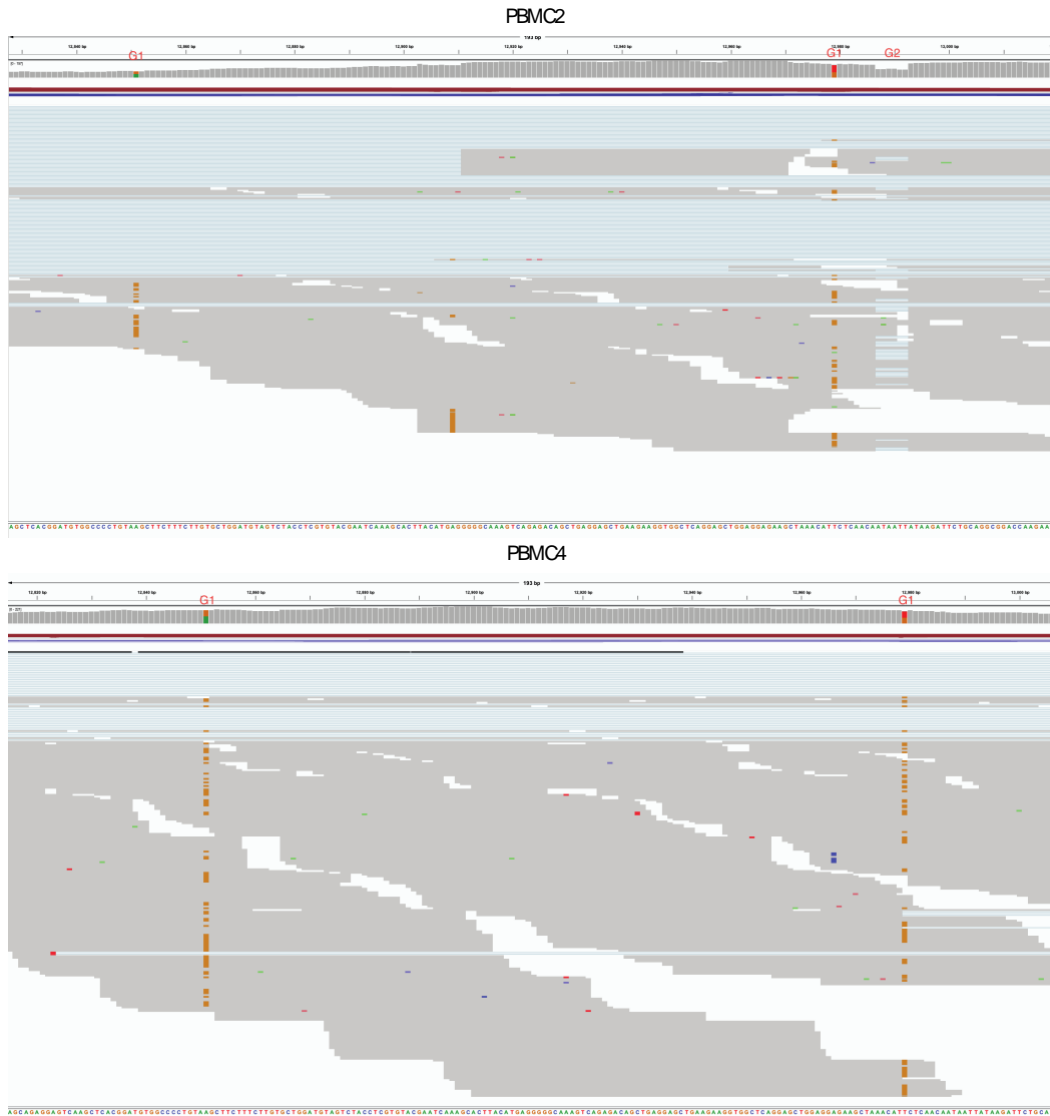

**Figure S5. Allele specific expression of APOL1 in single cell RNA sequencing data from pre-transplant PBMCs of GOCAR recipients.** Visualization of the expression of APOL1 risk alleles in two GOCAR recipients using Integrative Genomics Viewer (IGV). (1) PBMC2 carries G1/G2 genotype and PBMC4 carries G1/G0 genotype. The short reads are represented by gray thick segments. The G1 allele (the two SNPs in almost perfect linkage disequilibrium) is indicated by red dots, while the G2 allele (the 6 bp micro-deletion) is indicated by short blue segments.

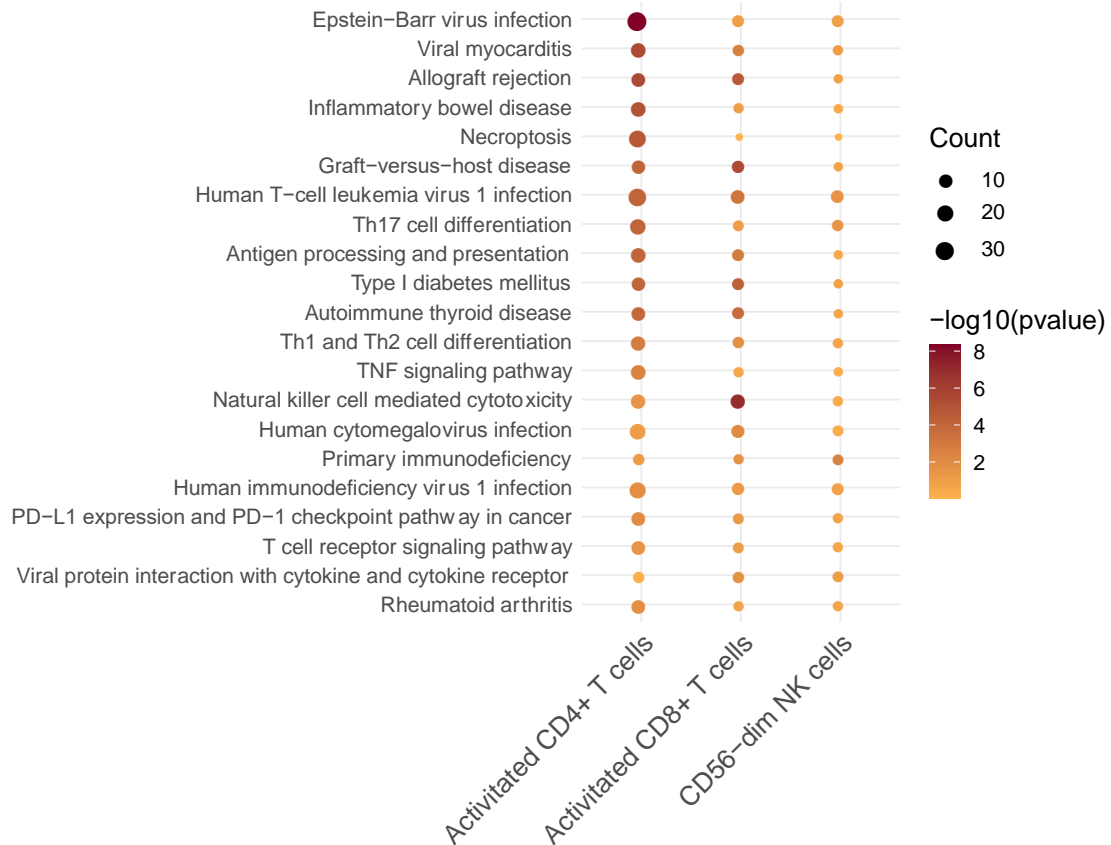

**Figure S6. Enrichment in immune related pathways of DEGs in scRNAseq data from PBMCs of two AA/H ESRD patients.** DEGs were identified by comparing the patient with APOL1 G2/G0 genotype vs. the patient with G0/G0 genotype in activated CD4<sup>+</sup> and CD8<sup>+</sup> T cells and CD56<sup>dim</sup> NK cells.



## Supplementary Tables

**Table S1. Demographic and clinicopathologic characteristics of GOCAR and CTOT donors and recipients with genome-wide genotype data.**

| Variable                                            | GOCAR D-R pairs<br>with genotype<br>(n = 385) <sup>a</sup> | CTOT D-R pairs<br>with genotype<br>(n = 122) <sup>b</sup> | p-value <sup>c</sup>    |
|-----------------------------------------------------|------------------------------------------------------------|-----------------------------------------------------------|-------------------------|
| <b><u>Recipient</u></b>                             |                                                            |                                                           |                         |
| <b>Death censored graft loss (years)</b>            |                                                            |                                                           |                         |
| mean ± SD; median (range)                           | 4.6 ± 1.7;<br>4.9 (0.04, 7.3)                              | 3.7 ± 1.8;<br>5.0 (0.02, 5.0)                             | <b>&lt;0.001</b>        |
| # events (%)                                        | 50 (13.0%)                                                 | 6 (4.9%)                                                  | <b>0.01</b>             |
| <b>TCMR ≥ borderline, # events (%)</b>              | 126 (32.7%)                                                | 15 (12.3%)                                                | <b>&lt;0.001</b>        |
| <b>TCMR &gt; borderline, # events (%)</b>           | 36 (9.4%)                                                  | 1 (0.8%)                                                  | <b>&lt;0.001</b>        |
| <b>Recurrent TCMR ≥ borderline, # events (%)</b>    | 59 (15.3%)                                                 | -                                                         | -                       |
| <b>Recurrent TCMR &gt; borderline, # events (%)</b> | 25 (6.5%)                                                  | -                                                         | -                       |
| <b>Age (years), mean ± SD; median (range)</b>       | 49.9 ± 13.5;<br>50 (18, 83)                                | 48.8 ± 13.6;<br>50 (18, 89)                               | 0.44                    |
| <b>Gender, male, n (%)</b>                          | 257 (66.8%)                                                | 74 (60.7%)                                                | 0.23                    |
| <b>Genetic ancestry<sup>d</sup>, n (%)</b>          |                                                            |                                                           | 0.30                    |
| African American                                    | 70 (18.2%)                                                 | 30 (24.6%)                                                |                         |
| Asian                                               | 13 (3.4%)                                                  | 2 (1.6%)                                                  |                         |
| Caucasian                                           | 235 (61.0%)                                                | 74 (60.7%)                                                |                         |
| Hispanic                                            | 67 (17.4%)                                                 | 16 (13.1%)                                                |                         |
| <b>HLA mismatch score<sup>e</sup>, n (%)</b>        | 2.0 ± 1.0                                                  | 3.3 ± 1.8                                                 | <b>0.03<sup>f</sup></b> |
| <b>Induction, n (%)</b>                             |                                                            |                                                           | 0.11                    |
| No induction                                        | 78 (20.3%)                                                 | 36 (29.5%)                                                |                         |
| Non-depletional (IL2 antagonist)                    | 130 (33.8%)                                                | 36 (29.5%)                                                |                         |
| Depletional (Thymoglobulin or Campath)              | 177 (46.0%)                                                | 50 (41.0%)                                                |                         |
| <b># APOL1 risk alleles<sup>g</sup>, n (%)</b>      |                                                            |                                                           | <b>0.001</b>            |
| 0                                                   | 316 (82.1%)                                                | 94 (77.0%)                                                |                         |
| 1                                                   | 20 (5.2%)                                                  | 17 (13.9%)                                                |                         |
| 2                                                   | 20 (5.2%)                                                  | 9 (7.4%)                                                  |                         |
| N/A                                                 | 29 (7.5%)                                                  | 2 (1.6%)                                                  |                         |

---

| <b>Donor</b>                                      |                                |                                |                  |
|---------------------------------------------------|--------------------------------|--------------------------------|------------------|
| <b>Age</b> (years), mean $\pm$ SD; median (range) | 42.6 $\pm$ 14.7;<br>45 (3, 73) | 40.3 $\pm$ 12.3;<br>39 (6, 65) | 0.09             |
| <b>Gender</b> , male, n (%)                       | 196 (50.9%)                    | 49 (40.2%)                     | <b>0.05</b>      |
| <b>Genetic ancestry</b> , n (%)                   |                                |                                | <b>0.003</b>     |
|                                                   | African American               | 33 (8.6%)                      | 26 (21.3%)       |
|                                                   | Asian                          | 7 (1.8%)                       | 2 (1.6%)         |
|                                                   | Caucasian                      | 293 (76.1%)                    | 78 (63.9%)       |
|                                                   | Hispanic                       | 52 (13.5%)                     | 16 (13.1%)       |
| <b>Donor type</b> , live donor, n (%)             | 194 (50.4%)                    | 105 (86.8%)                    | <b>&lt;0.001</b> |
| <b># APOL1 risk alleles<sup>g</sup></b> , n (%)   |                                |                                | <b>&lt;0.001</b> |
|                                                   | 0                              | 355 (92.2%)                    | 99 (81.1%)       |
|                                                   | 1                              | 10 (2.6%)                      | 16 (13.1%)       |
|                                                   | 2                              | 6 (1.6%)                       | 5 (4.1%)         |
|                                                   | N/A                            | 14 (3.6%)                      | 2 (1.6%)         |

---

<sup>a</sup>: Genome-wide genotype data is available for 385 donor-recipient (D-R) pairs from the parent GOCAR study after data processing and quality control detailed elsewhere.(2)

<sup>b</sup>: Genome-wide genotype data is available for 122 donor-recipient (D-R) pairs from the parent CTOT study after data processing and quality control (see Methods).

<sup>c</sup>: P-value was calculated from unpaired t-test for continuous variables and from Fisher's exact test for categorical variables unless otherwise specified. Bold p-value < 0.05.

<sup>d</sup>: Genetic ancestry was inferred from genome-wide genotype data and considered more accurate than self-reported race.(2)

<sup>e</sup>: HLA mismatch score was derived from 2-digit HLA allele typing. Following previous reports for GOCAR,(2-4) the raw mismatch score (scaling from 0 to 6) was categorized into: 0 (no mismatches), 1 (1-2 mismatches), 2 (3-4 mismatches), and 3 (5-6 mismatches); while for the CTOT cohort, the raw mismatch score (scaling from 0 to 6) was used. In subsequent statistical analyses, this variable was used as numeric covariate in regression models.

<sup>f</sup>: In order to calculate the p-value, the raw HLA mismatch score used in CTOT was hereby categorized in the same way as GOCAR so that the HLA mismatch scores originally defined on different scales in the two cohorts are comparable. The p-value was calculated by Fisher's exact test.

<sup>g</sup>: There are missing data in the APOL1 genotype of 29 recipients and 14 donors for GOCAR cohort and of 2 recipients and 2 donors for CTOT cohort (see supplementary Table S3 for details).

**Table S2. Genetic ancestry and self-reported ancestry of donors and recipients in CTOT.** Genetic ancestry is inferred from genome-wide genetic data for n = 122 D-R pairs.

**(a) Donor: Genetic ancestry versus self-reported race**

|                  |                  | Self-reported Race |       |           |          |                   |
|------------------|------------------|--------------------|-------|-----------|----------|-------------------|
|                  |                  | African American   | Asian | Caucasian | Hispanic | Other/ Unreported |
| Genetic Ancestry | African American | 26                 | 0     | 0         | 0        | 0                 |
|                  | Asian            | 0                  | 2     | 0         | 0        | 0                 |
|                  | Caucasian        | 0                  | 0     | 76        | 0        | 2                 |
|                  | Hispanic         | 1                  | 1     | 5         | 0        | 9                 |

**(b) Recipient: Genetic ancestry versus self-reported race**

|                  |                  | Self-reported Race |       |           |          |                   |
|------------------|------------------|--------------------|-------|-----------|----------|-------------------|
|                  |                  | African American   | Asian | Caucasian | Hispanic | Other/ Unreported |
| Genetic Ancestry | African American | 30                 | 0     | 0         | 0        | 0                 |
|                  | Asian            | 0                  | 2     | 0         | 0        | 0                 |
|                  | Caucasian        | 0                  | 0     | 74        | 0        | 0                 |
|                  | Hispanic         | 3                  | 0     | 4         | 0        | 9                 |

**(c) Donor and recipient genetic ancestry**

|                        |                  | Recipient Genetic Ancestry |       |           |          | Total |
|------------------------|------------------|----------------------------|-------|-----------|----------|-------|
|                        |                  | African American           | Asian | Caucasian | Hispanic |       |
| Donor Genetic Ancestry | African American | 24                         | 0     | 1         | 1        | 26    |
|                        | Asian            | 0                          | 2     | 0         | 0        | 2     |
|                        | Caucasian        | 4                          | 0     | 72        | 2        | 78    |
|                        | Hispanic         | 2                          | 0     | 1         | 13       | 16    |
|                        | Total            | 30                         | 2     | 74        | 16       | 122   |

**Table S3. APOL1 risk genotype in donor-recipient pairs of GOCAR and CTOT.**

**(A) GOCAR (n = 385 D-R pairs)**

|                           |                        | Recipient APOL1 risk genotype |                |                        |     | Total |
|---------------------------|------------------------|-------------------------------|----------------|------------------------|-----|-------|
|                           |                        | G0/G0                         | G0/G1 or G0/G2 | G1/G1, G1/G2, or G2/G2 | N/A |       |
| Donor APOL1 risk genotype | G0/G0                  | 305                           | 17             | 14                     | 19  | 355   |
|                           | G0/G1 or G0/G2         | 6                             | 0              | 1                      | 3   | 10    |
|                           | G1/G1, G1/G2, or G2/G2 | 0                             | 2              | 2                      | 2   | 6     |
|                           | N/A                    | 5                             | 1              | 3                      | 5   | 14    |
| Total                     |                        | 316                           | 20             | 20                     | 29  | 385   |

**(B) CTOT (n = 122 D-R pairs)**

|                           |                        | Recipient APOL1 risk genotype |                |                        |     | Total |
|---------------------------|------------------------|-------------------------------|----------------|------------------------|-----|-------|
|                           |                        | G0/G0                         | G0/G1 or G0/G2 | G1/G1, G1/G2, or G2/G2 | N/A |       |
| Donor APOL1 risk genotype | G0/G0                  | 87                            | 7              | 5                      | 0   | 99    |
|                           | G0/G1 or G0/G2         | 5                             | 8              | 3                      | 0   | 16    |
|                           | G1/G1, G1/G2, or G2/G2 | 2                             | 2              | 1                      | 0   | 5     |
|                           | N/A                    | 0                             | 0              | 0                      | 2   | 2     |
| Total                     |                        | 94                            | 17             | 9                      | 2   | 122   |

**Table S4. Summary of APOL1 risk alleles in GOCAR and CTOT cohorts stratified by recipients and donors with different genetic ancestries.**

| Genetic Ancestry                 | Recipient #APOL1 risk alleles |    |    |     | Total | Donor #APOL1 risk alleles |    |   |     | Total |
|----------------------------------|-------------------------------|----|----|-----|-------|---------------------------|----|---|-----|-------|
|                                  | 0                             | 1  | 2  | N/A |       | 0                         | 1  | 2 | N/A |       |
| <b>GOCAR (n = 385 D-R pairs)</b> |                               |    |    |     |       |                           |    |   |     |       |
| African American                 | 12                            | 16 | 15 | 27  | 70    | 9                         | 7  | 6 | 11  | 33    |
| Asian                            | 13                            | 0  | 0  | 0   | 13    | 7                         | 0  | 0 | 0   | 7     |
| Caucasian                        | 235                           | 0  | 0  | 0   | 235   | 293                       | 0  | 0 | 0   | 293   |
| Hispanic                         | 56                            | 4  | 5  | 2   | 67    | 46                        | 3  | 0 | 3   | 52    |
| All                              | 316                           | 20 | 20 | 29  | 385   | 355                       | 10 | 6 | 14  | 385   |
| <b>CTOT (n = 122 D-R pairs)</b>  |                               |    |    |     |       |                           |    |   |     |       |
| African American                 | 8                             | 14 | 8  | 0   | 30    | 6                         | 15 | 5 | 0   | 26    |
| Asian                            | 2                             | 0  | 0  | 0   | 2     | 2                         | 0  | 0 | 0   | 2     |
| Caucasian                        | 72                            | 0  | 0  | 2   | 74    | 76                        | 0  | 0 | 2   | 78    |
| Hispanic                         | 12                            | 3  | 1  | 0   | 15    | 15                        | 1  | 0 | 0   | 16    |
| All                              | 94                            | 17 | 9  | 2   | 122   | 99                        | 16 | 5 | 2   | 122   |

**Table S5. Association of recipient APOL1 risk alleles with death-censored allograft loss under different genetic models in multivariable Cox regression analysis of the GOCAR cohort.**

| Genetic Model <sup>a,b</sup>                                                                                                                                                                   | beta <sup>c</sup> | HR (95% CI)       | p-value | R <sup>2</sup> <sup>d</sup> | AIC <sup>e</sup> | BIC <sup>f</sup> |
|------------------------------------------------------------------------------------------------------------------------------------------------------------------------------------------------|-------------------|-------------------|---------|-----------------------------|------------------|------------------|
| <b><u>GOCAR: recipients of all ancestries<sup>g</sup>, (n = 343<sup>h</sup>; 44 [12.8%] graft loss events)</u></b>                                                                             |                   |                   |         |                             |                  |                  |
| Additive model                                                                                                                                                                                 | 0.76              | 2.14 (1.25, 3.67) | 0.006   | 0.1151                      | 451.45           | 463.94           |
| Dominant model                                                                                                                                                                                 | 1.27              | 3.57 (1.24, 10.3) | 0.018   | 0.1114                      | 452.88           | 465.37           |
| Recessive model                                                                                                                                                                                | 1.16              | 3.19 (1.25, 8.15) | 0.016   | 0.1108                      | 453.09           | 465.58           |
| <b><u>GOCAR: recipients of African American and Hispanic, (n = 108<sup>h</sup>; 26 [24.1%] graft loss events)</u></b>                                                                          |                   |                   |         |                             |                  |                  |
| Additive model                                                                                                                                                                                 | 0.84              | 2.32 (1.33, 4.06) | 0.003   | 0.1820                      | 212.48           | 220.03           |
| Dominant model                                                                                                                                                                                 | 1.45              | 4.27 (1.41, 12.9) | 0.010   | 0.1708                      | 213.94           | 221.49           |
| Recessive model                                                                                                                                                                                | 1.27              | 3.56 (1.36, 9.33) | 0.010   | 0.1662                      | 214.54           | 222.09           |
| <b><u>GOCAR: recipients of all ancestries<sup>g</sup>, within the stratum of donors carrying APOL1 low-risk genotype<sup>i</sup> (n = 330<sup>h</sup>; 41 [12.4%] graft loss events)</u></b>   |                   |                   |         |                             |                  |                  |
| Additive model                                                                                                                                                                                 | 0.66              | 1.93 (1.06, 3.49) | 0.030   | 0.1033                      | 419.34           | 431.34           |
| Dominant model                                                                                                                                                                                 | 0.98              | 2.66 (0.86, 8.22) | 0.089   | 0.0994                      | 420.79           | 432.79           |
| Recessive model                                                                                                                                                                                | 1.07              | 2.91 (1.04, 8.10) | 0.041   | 0.1019                      | 419.88           | 431.88           |
| <b><u>GOCAR: recipients of African American and Hispanic, within the stratum of donors carrying APOL1 low-risk genotype<sup>i</sup> (n = 97<sup>h</sup>; 23 [23.7%] graft loss events)</u></b> |                   |                   |         |                             |                  |                  |
| Additive model                                                                                                                                                                                 | 0.74              | 2.11 (1.14, 3.88) | 0.017   | 0.1562                      | 185.15           | 191.96           |
| Dominant model                                                                                                                                                                                 | 1.17              | 3.23 (0.99, 10.6) | 0.053   | 0.1434                      | 186.61           | 193.42           |
| Recessive model                                                                                                                                                                                | 1.18              | 3.26 (1.14, 9.33) | 0.028   | 0.1482                      | 186.06           | 192.87           |

<sup>a</sup>: In the additive model, the number of recipient APOL1 risk alleles was treated as numeric variable; in the dominant model, the recipients carrying 1 or 2 risk alleles were compared with those with no risk alleles; in the recessive model, the recipients carrying 2 risk alleles were compared with those with 0 or 1 risk allele.

<sup>b</sup>: In the multivariable Cox regression model, adjusted covariates include recipient genetic ancestry, induction, donor type and HLA mismatch score. For concise presentation, only the results for the recipient APOL1 risk genotype variable were shown in the table.

<sup>c</sup>: Beta is the coefficient of the recipient APOL1 risk genotype variable in the linear predictor of the Cox regression model.

<sup>d</sup>: An approximate R<sup>2</sup> based on Nagelkerke NJD, *Biometrika*, 1991, 78(3): 691-692. A larger value indicates better goodness-of-fit.

<sup>e</sup>: AIC: Akaike's Information Criterion, defined as  $-2 \times \log\text{-likelihood} + 2 \times \text{npar}$ , where npar is the number of parameters in the model. A smaller value indicates better goodness-of-fit.

<sup>f</sup>: BIC: Bayesian Information Criterion, defined as  $-2 \times \log\text{-likelihood} + \log(n) \times \text{npar}$ , where npar is the number of parameters in the model, and n is the sample size. A smaller value indicates better goodness-of-fit.

<sup>g</sup>: The "Asian" category was excluded due to limited sample size which led to instable model fitting.

<sup>h</sup>: Sample size was reduced due to missing data in APOL1 risk alleles.

<sup>i</sup>: Donor APOL1 high-risk genotype is defined as 2 copies of G1/G2 alleles and low-risk genotype as 0 or 1 G1/G2 allele. In this analysis, we focused on the stratum of donors with APOL1 low-risk genotype, because the model fitting would not have converged if the donor APOL1 risk genotype had been included as a covariate due to the limited number of donors with APOL1 high-risk genotype.

**Table S6. Association of APOL1 risk alleles with death-censored allograft loss in an additive manner in CTOT cohort.**

| Variable <sup>a</sup>                                                                                             | HR   | 95% CI       | p-value <sup>d</sup> |
|-------------------------------------------------------------------------------------------------------------------|------|--------------|----------------------|
| <b><i>CTOT: recipients all ancestries<sup>b</sup> (n = 117<sup>c</sup>; 6 [5.1%] graft loss events)</i></b>       |      |              |                      |
| # APOL1 risk alleles                                                                                              | 2.73 | (1.04, 7.20) | <b>0.04</b>          |
| Donor type (ref: LD) DD                                                                                           | 3.85 | (0.71, 20.8) | 0.12                 |
| HLA mismatch score                                                                                                | 1.16 | (0.73, 1.83) | 0.52                 |
| <b><i>CTOT: recipients of African American and Hispanic (n = 46<sup>c</sup>; 6 [13.0%] graft loss events)</i></b> |      |              |                      |
| # APOL1 risk alleles                                                                                              | 1.32 | (0.46, 3.81) | 0.60                 |
| Donor type (ref: LD) DD                                                                                           | 3.96 | (0.70, 22.4) | 0.12                 |
| HLA mismatch score                                                                                                | 1.08 | (0.64, 1.84) | 0.77                 |

<sup>a</sup>: In the multivariable Cox regression model, donor type and HLA mismatch score were forced into model, while other covariates adjusted in GOCAR data, including recipient ancestry and induction, that were not significant in multivariable analysis were not included in order to increase statistical power for the CTOT cohort with limited sample size.

<sup>b</sup>: The “Asian” category was excluded due to limited sample size which led to instable model fitting.

<sup>c</sup>: Sample size was reduced due to missing data in donor APOL1 risk alleles.

<sup>d</sup>: Bold p-value < 0.05.

**Table S7. Association of recipient APOL1 risk alleles with death-censored allograft loss using multivariable Cox regression, within the stratum of donors carrying APOL1 low-risk genotype in the GOCAR cohort.**

| Variable                                                                                                                                                                                       | HR   | 95% CI       | p-value <sup>d</sup> |
|------------------------------------------------------------------------------------------------------------------------------------------------------------------------------------------------|------|--------------|----------------------|
| <b><u>GOCAR: recipients of all ancestries<sup>a</sup>, within the stratum of donors carrying APOL1 low-risk genotype<sup>b</sup> (n = 330<sup>c</sup>; 41 [12.4%] graft loss events)</u></b>   |      |              |                      |
| # APOL1 risk alleles                                                                                                                                                                           | 1.93 | (1.06, 3.49) | <b>0.03</b>          |
| Recipient genetic ancestry (ref: Caucasian)                                                                                                                                                    |      |              |                      |
| <b>African American</b>                                                                                                                                                                        | 1.02 | (0.29, 3.57) | 0.98                 |
| <b>Hispanic</b>                                                                                                                                                                                | 2.70 | (1.23, 5.95) | <b>0.01</b>          |
| Induction (ref: No)                                                                                                                                                                            |      |              |                      |
| <b>Non-depletional</b>                                                                                                                                                                         | 2.84 | (0.92, 8.79) | 0.07                 |
| <b>Depletional</b>                                                                                                                                                                             | 3.56 | (1.14, 11.1) | <b>0.03</b>          |
| Donor type (ref: LD) DD                                                                                                                                                                        | 2.62 | (1.24, 5.51) | <b>0.01</b>          |
| HLA mismatch score                                                                                                                                                                             | 1.20 | (0.81, 1.77) | 0.36                 |
| <b><u>GOCAR: recipients of African American and Hispanic, within the stratum of donors carrying APOL1 low-risk genotype<sup>b</sup> (n = 97<sup>c</sup>; 23 [23.7%] graft loss events)</u></b> |      |              |                      |
| # APOL1 risk alleles                                                                                                                                                                           | 2.11 | (1.14, 3.88) | <b>0.02</b>          |
| Recipient genetic ancestry (ref: AA) Hispanic                                                                                                                                                  | 2.98 | (0.90, 9.82) | 0.07                 |
| Induction (ref: No)                                                                                                                                                                            |      |              |                      |
| <b>Non-depletional</b>                                                                                                                                                                         | 5.46 | (0.62, 47.7) | 0.13                 |
| <b>Depletional</b>                                                                                                                                                                             | 4.93 | (0.60, 40.7) | 0.14                 |
| Donor type (ref: LD) DD                                                                                                                                                                        | 2.90 | (0.88, 9.55) | 0.08                 |
| HLA mismatch score                                                                                                                                                                             | 1.67 | (0.85, 3.30) | 0.14                 |

<sup>a</sup>: The “Asian” category was excluded due to limited sample size which led to instable model fitting.

<sup>b</sup>: Donor APOL1 high-risk genotype is defined as 2 copies of G1/G2 alleles and low-risk genotype as 0 or 1 G1/G2 allele.

<sup>c</sup>: Sample size was reduced due to missing data in APOL1 risk alleles.

<sup>d</sup>: Bold p-value < 0.05.



**Table S8. Association of recipient APOL1 risk alleles with death-censored allograft loss using multivariable Cox regression, within the stratum of donors carrying APOL1 low-risk genotype in the CTOT cohort.**

| Variable <sup>a</sup>                                                                                                                                                                        | HR   | 95% CI       | p-value <sup>e</sup> |
|----------------------------------------------------------------------------------------------------------------------------------------------------------------------------------------------|------|--------------|----------------------|
| <b><u>CTOT: recipients all ancestries<sup>b</sup>, within the stratum of donors carrying APOL1 low risk genotype<sup>c</sup> (n = 112<sup>d</sup>; 6 [5.4%] graft loss events)</u></b>       |      |              |                      |
| # APOL1 risk alleles                                                                                                                                                                         | 2.84 | (1.05, 7.70) | <b>0.04</b>          |
| Donor type (ref: LD) DD                                                                                                                                                                      | 3.61 | (0.67, 19.4) | 0.13                 |
| HLA mismatch score                                                                                                                                                                           | 1.13 | (0.71, 1.79) | 0.62                 |
| <b><u>CTOT: recipients of African American and Hispanic, within the stratum of donors carrying APOL1 low risk genotype<sup>c</sup> (n = 41<sup>d</sup>; 6 [14.6%] graft loss events)</u></b> |      |              |                      |
| # APOL1 risk alleles                                                                                                                                                                         | 1.32 | (0.45, 3.91) | 0.62                 |
| Donor type (ref: LD) DD                                                                                                                                                                      | 3.76 | (0.67, 21.1) | 0.13                 |
| HLA mismatch score                                                                                                                                                                           | 1.04 | (0.60, 1.80) | 0.88                 |

<sup>a</sup>: In the multivariable Cox regression model, donor type and HLA mismatch score were forced into model, while other covariates adjusted in GOCAR data, including recipient ancestry and induction, that were not significant in multivariable analysis were not included in order to increase statistical power for the CTOT cohort with limited sample size.

<sup>b</sup>: The “Asian” category was excluded due to limited sample size which led to instable model fitting.

<sup>c</sup>: Donor APOL1 high-risk genotype is defined as 2 copies of G1/G2 alleles and low-risk genotype as 0 or 1 G1/G2 allele.

<sup>d</sup>: Sample size was reduced due to missing data in donor APOL1 risk alleles.

<sup>e</sup>: Bold p-value < 0.05.

**Table S9. Association of recipient APOL1 risk alleles with different TCMR outcomes in the CTOT cohort.**

| TCMR outcome                                                    | n <sub>control</sub> <sup>a,b</sup> | n <sub>case</sub> <sup>a</sup> | HR   | 95% CI       | p-value <sup>d</sup> |
|-----------------------------------------------------------------|-------------------------------------|--------------------------------|------|--------------|----------------------|
| <b><i>CTOT: recipient of all ancestries</i></b>                 |                                     |                                |      |              |                      |
| <b>TCMR &gt;= borderline</b> (Univariate)                       | 106                                 | 14                             | 2.32 | (1.06, 4.87) | <b>0.03</b>          |
| <b>TCMR &gt;= borderline</b> (Multivariable <sup>c</sup> )      | 100                                 | 14                             | 2.32 | (1.02, 5.16) | <b>0.04</b>          |
| <b><i>CTOT: recipients of African American and Hispanic</i></b> |                                     |                                |      |              |                      |
| <b>TCMR &gt;= borderline</b> (Univariate)                       | 39                                  | 7                              | 2.95 | (1.01, 10.3) | 0.06                 |
| <b>TCMR &gt;= borderline</b> (Multivariable <sup>c</sup> )      | 34                                  | 7                              | 3.39 | (1.07, 13.6) | <b>0.05</b>          |

<sup>a</sup>: Sample size was reduced due to missing data in APOL1 risk alleles for univariate analysis and due to missing data in APOL1 risk alleles and HLA mismatch score for multivariable analysis.

<sup>b</sup>: Controls (no TCMR) were defined as patients with either (a) no TCMR or borderline TCMR on obtained biopsies at anytime, or (b) no reported biopsies during follow up.

<sup>c</sup>: In the multivariable Cox regression model, we focused on the stratum of donors with APOL1 low-risk genotype carrying 0 or 1 G1/G2 allele, because the model fitting would not have converged if the donor APOL1 risk genotype had been included as a covariate due to the limited number (n = 5) of donors with APOL1 high-risk genotype carrying 2 G1/G2 alleles. HLA mismatch score were forced into model, while other covariates adjusted in GOCAR data, including recipient ancestry, induction, and donor type that were not significant in multivariable analysis were not included in order to increase statistical power for the CTOT cohort with limited sample size.

<sup>d</sup>: Bold p-value < 0.05.

**Table S10. Association of APOL1 risk alleles with death-censored allograft loss independent of APOL1 SNP-wise mismatch in GOCAR and CTOT.**

| Variable <sup>a</sup>                                                                                                | HR   | 95% CI       | p-value <sup>d</sup> |
|----------------------------------------------------------------------------------------------------------------------|------|--------------|----------------------|
| <b><u>GOCAR: recipients of all ancestries<sup>b</sup> (n = 343<sup>c</sup>; 44 [12.8%] graft loss events)</u></b>    |      |              |                      |
| # APOL1 risk alleles                                                                                                 | 2.24 | (1.30, 3.86) | <b>0.004</b>         |
| APOL1 SNP-wise mismatch                                                                                              | 0.75 | (0.40, 1.44) | 0.39                 |
| <b><u>GOCAR: recipients of African American and Hispanic (n = 108<sup>c</sup>; 26 [24.1%] graft loss events)</u></b> |      |              |                      |
| # APOL1 risk alleles                                                                                                 | 2.46 | (1.38, 4.40) | <b>0.002</b>         |
| APOL1 SNP-wise mismatch                                                                                              | 0.75 | (0.32, 1.76) | 0.51                 |
| <b><u>CTOT: recipients of all ancestries (n = 117<sup>c</sup>; 6 [5.1%] graft loss events)</u></b>                   |      |              |                      |
| # APOL1 risk alleles                                                                                                 | 2.56 | (0.98, 6.73) | 0.06                 |
| APOL1 SNP-wise mismatch                                                                                              | 1.39 | (0.73, 2.66) | 0.31                 |
| <b><u>CTOT: recipients of African American and Hispanic (n = 46<sup>c</sup>; 6 [13.0%] graft loss events)</u></b>    |      |              |                      |
| # APOL1 risk alleles                                                                                                 | 1.10 | (0.35, 3.41) | 0.87                 |
| APOL1 SNP-wise mismatch                                                                                              | 1.62 | (0.78, 3.35) | 0.19                 |

<sup>a</sup>: In the Cox regression model for GOCAR, covariates include recipient ancestry, number of APOL1 risk alleles, and APOL1 SNP-wise mismatch, induction, donor type, and HLA mismatch score. In the multivariable Cox regression model for CTOT, donor type and HLA mismatch score were forced into model, while other covariates adjusted in GOCAR data, including recipient ancestry and induction, that were not significant in multivariable analysis were not included in order to increase statistical power for the CTOT cohort with limited sample size. For concise presentation, only recipient number of APOL1 risk alleles and APOL1 SNP-wise mismatch were shown in the table.

<sup>b</sup>: The “Asian” category was excluded due to limited sample size which led to instable model fitting.

<sup>c</sup>: Sample size was reduced due to missing data in APOL1 risk alleles.

<sup>d</sup>: Bold p-value < 0.05.

**Table S11. Enrichment in KEGG pathways of DEGs identified in immune cells in DICE data.**

(Supplementary\_Tables\_S11\_S13\_S14.xlsx)

**Table S12. GOCAR recipients with generated single cell RNA-seq data.**

| Sample ID | Age | Gender | Genetic Ancestry | APOL1 Genotype | Recurrent TCMR | Graft Loss during follow-up |
|-----------|-----|--------|------------------|----------------|----------------|-----------------------------|
| PBMC1     | 68  | Female | African American | G0/G0          | No             | No                          |
| PBMC2     | 41  | Male   | African American | G1/G2          | Yes            | Yes                         |
| PBMC3     | 71  | Male   | African American | G0/G0          | No             | No                          |
| PBMC4     | 58  | Male   | African American | G1/G0          | Yes            | Yes                         |

**Table S13. Enrichment in KEGG pathways of DEGs identified from four GOCAR recipients with single cell RNA sequencing data of pre-transplant PBMCs.**

(Supplementary\_Tables\_S11\_S13\_S14.xlsx)

**Table S14. Enrichment in immune related pathways of DEGs identified from a subset of GOCAR recipients with PBMC bulk RNA sequencing data.**

(Supplementary\_Tables\_S11\_S13\_S14.xlsx)

**Table S15. Genes used to define cell types in the scRNAseq data analysis.**

| Cell type                         | Genes used to define cell type           |
|-----------------------------------|------------------------------------------|
| CD4 <sup>+</sup> T cell           | CD3D, CD3E, LTB, IL7R                    |
| CD8 <sup>+</sup> T cell           | CD3D, CD3E, CD8A, CD8B                   |
| Activated CD4 <sup>+</sup> T cell | CD3D, CD3E, LTB, TNF, STAT1, MAF         |
| Activated CD8 <sup>+</sup> T cell | CD3D, CD3E, CD8A, CD8B, GZMB, GNLY, PRF1 |
| CD56 <sup>dim</sup> NK cell       | GNLY, NKG7, PRF1, GZMB, GZMH, FGFBP2     |
| Monocyte                          | CD14, LYZ, S100A8, S100A9                |
| B Cell                            | CD19, CD79A, CD74, MS4A1                 |

## References

1. Robinson JT, Thorvaldsdóttir H, Winckler W, Guttman M, Lander ES, Getz G, et al. Integrative genomics viewer. *Nature Biotechnology*. 2011;29(1):24-6.
2. Zhang Z, Menon MC, Zhang W, Stahl E, Loza B-L, Rosales IA, et al. Genome-wide non-HLA donor-recipient genetic differences influence renal allograft survival via early allograft fibrosis. *Kidney International*. 2020;98(3):758-68.
3. O'Connell PJ, Zhang W, Menon MC, Yi Z, Schroppel B, Gallon L, et al. Biopsy transcriptome expression profiling to identify kidney transplants at risk of chronic injury: a multicentre, prospective study. *Lancet*. 2016;388(10048):983-93.
4. Zhang W, Yi Z, Keung KL, Shang H, Wei C, Cravedi P, et al. A Peripheral Blood Gene Expression Signature to Diagnose Subclinical Acute Rejection. *J Am Soc Nephrol*. 2019;30(8):1481-94.
